# Supplementary material
Source: Springer Nature journal article supplement (https://www.springermedizin.de/resource/supplementary/12889_2010_2499_MOESM2_ESM.pdf/9486172)

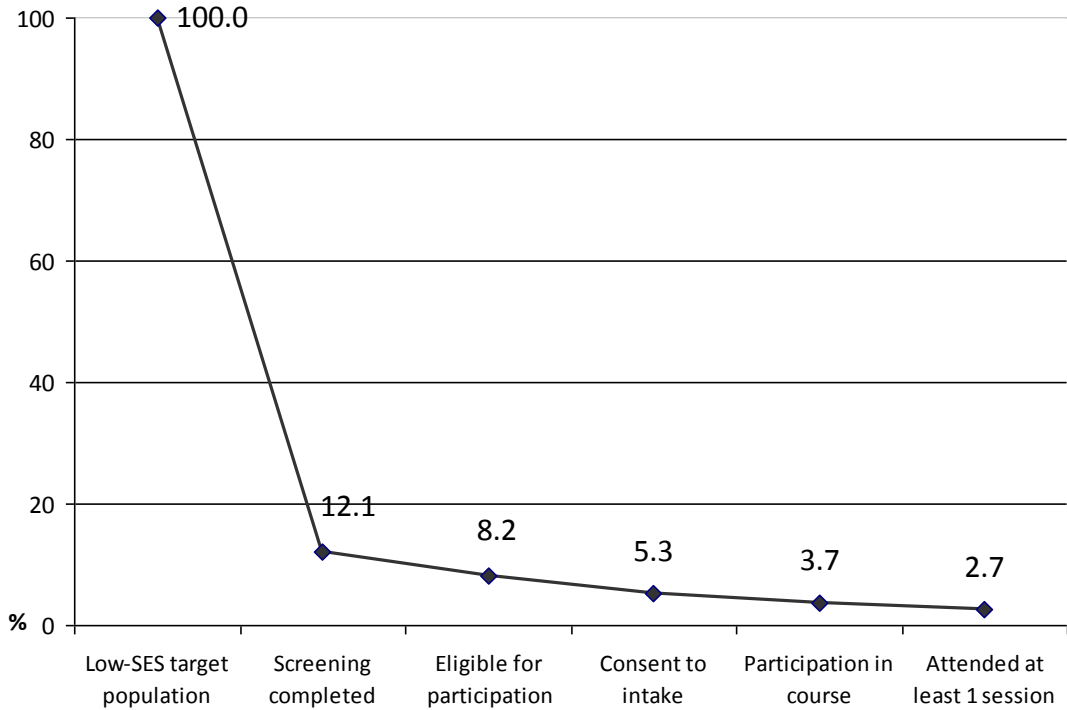

Supplement: MOESM2 [file 9486172]
